# Supplementary material for: MARCKS as a Potential Therapeutic Target in Inflammatory Breast Cancer
Source: MDPI journal article supplement (doi:10.3390/cells11182926), 2022-09-19
Supplement: s1 [file s1]

# Supplementary Material

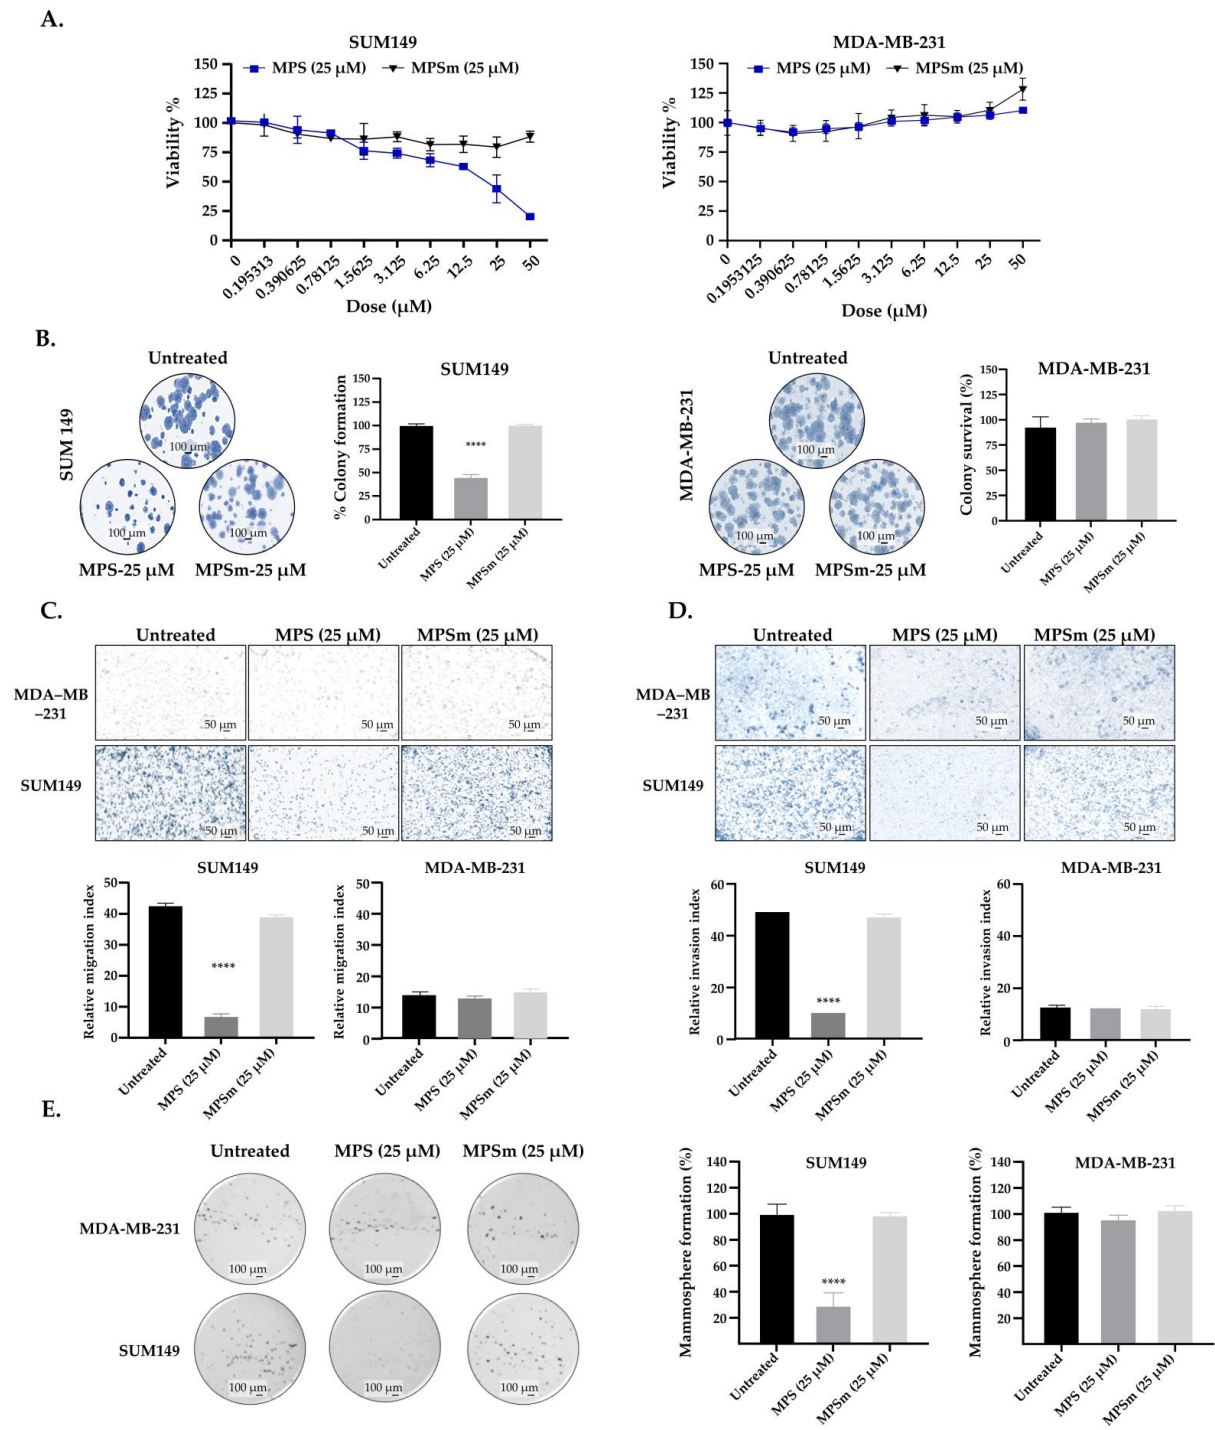

**Figure S1.** MARCKS promotes cell proliferation and motility of IBC. (A–E) Same as figures 1 and 2A, but we added the data for cells treated with MPS mutated or scrambled (MPSm) as a control for all our in vitro experiments. As shown in figures (A) (proliferation assay), (B) (colony formation assay), (C) (migration assay in chamber), (D) (invasion assay in chamber with Matrigel), and (E) (mammosphere formation assay), all the different experiments did not show any significant difference in terms of proliferation, cell motility and mammosphere formation between the untreated cells and the treated cells with MPSm. Data were represented as mean  $\pm$  SD. \*\*\*\* $p \leq 0.0001$ , (3 replicates).

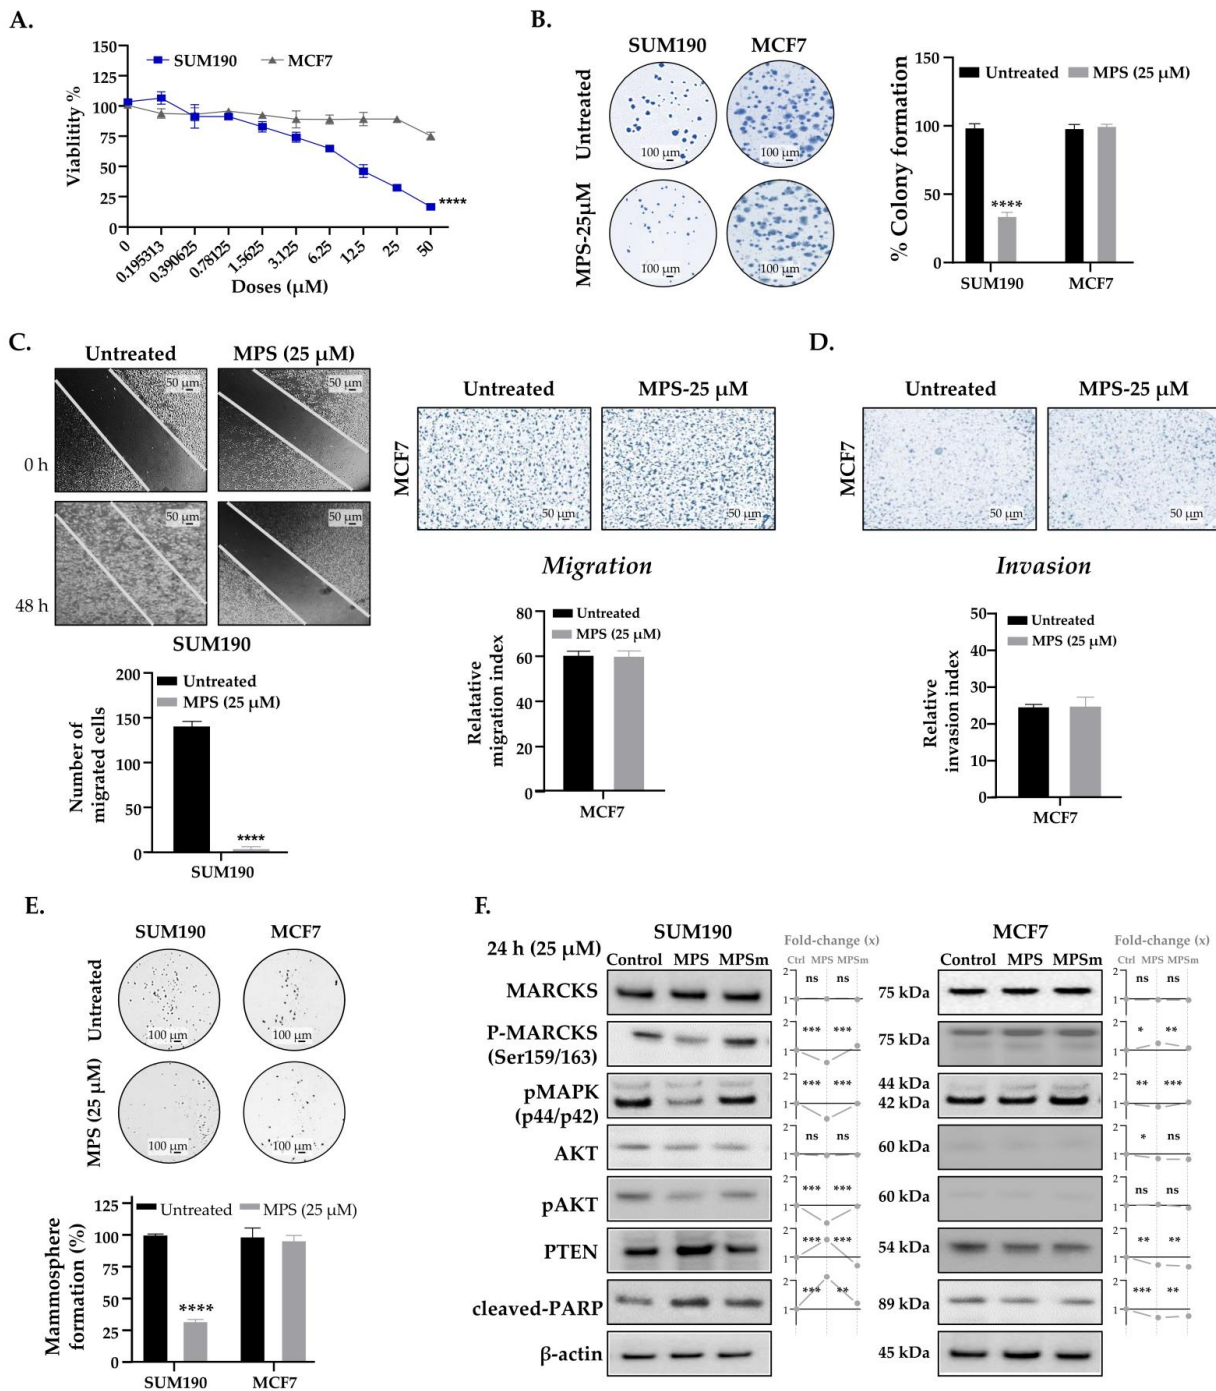

**Figure S2.** MARCKS promotes cell proliferation, motility, and mammosphere formation in IBC. (A–F). Same as figures 1 and 2 but for two other breast cancer cell lines overexpressing MARCKS: the SUM190 IBC cell line and the MCF7 nIBC cell line: (A) (proliferation assay), (B) (colony formation assay), (C) (migration assay in chamber (MCF7) and in scratch/wound-healing assay (SUM190)), (D) (invasion assay in chamber with Matrigel (MCF7)). Because SUM190 are big cells, we could not realize the migration and invasion in transwell chambers. (E) (mammosphere formation assay), and (F) (Western blot analysis). All the different experiments validated the results observed with SUM149 and MD-MB-231. Data were represented as mean  $\pm$  SD. \*\*\*\* $p \leq 0.0001$ , \*\*\* $p \leq 0.001$ , \*\* $p \leq 0.01$ , \* $p \leq 0.05$ , ns:  $p > 0.05$ , (3 replicates).

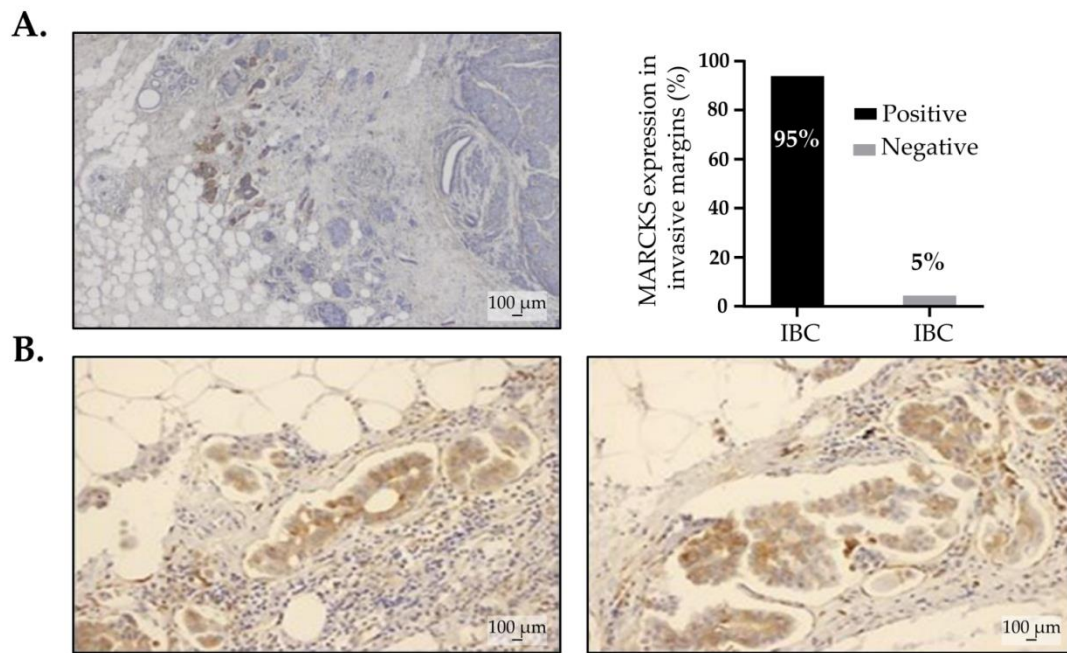

**Figure S3.** MARCKS overexpression in invasive margins and tumor emboli in IBC clinical tumor samples. (A) Left: IHC images showing MARCKS-positive cancer cells more expressed in the invasive margins (magnification  $\times 10$ ); right: Box plot showing the percentage of MARCKS-positive IBC tumor samples with (black) and without (grey) positive cancer cells in the invasive margins. (B) IHC images of MARCKS-positive cancer cells within tumor emboli for two different patients. (magnification  $\times 20$ ).

| IBC vs. nIBC, glm                      |                    | Univariate |            |                        | Multivariate |            |                        |
|----------------------------------------|--------------------|------------|------------|------------------------|--------------|------------|------------------------|
|                                        |                    | <i>n</i>   | Odds Ratio | <i>p</i> -value        | <i>n</i>     | Odds Ratio | <i>p</i> -value        |
| Age, years                             |                    | 500        |            | $1.01 \times 10^{-08}$ | 417          |            | $9.12 \times 10^{-05}$ |
| Pathological type,                     | lobular vs. ductal | 524        |            | $1.62 \times 10^{-02}$ | 417          |            | 0.666                  |
|                                        | mixed vs. ductal   | 524        |            | $2.77 \times 10^{-02}$ | 417          |            | 0.132                  |
|                                        | other vs. ductal   | 524        |            | $2.89 \times 10^{-04}$ | 417          |            | $3.74 \times 10^{-02}$ |
| Pathological grade, 2 vs. 1            |                    | 515        |            | $7.06 \times 10^{-05}$ | 417          |            | $4.48 \times 10^{-02}$ |
|                                        | 3 vs. 1            | 515        |            | $1.11 \times 10^{-12}$ | 417          |            | $5.23 \times 10^{-05}$ |
| Molecular Subtype, HR+/HER2- vs. HER2+ |                    | 430        |            | $3.33 \times 10^{-18}$ | 417          |            | $3.87 \times 10^{-09}$ |
|                                        | TN vs. HER2+       | 430        |            | $4.64 \times 10^{-07}$ | 417          |            | $5.41 \times 10^{-07}$ |
| MARCKS IHC                             | pos vs. neg        | 535        |            | $2.92 \times 10^{-05}$ | 417          |            | $3.06 \times 10^{-02}$ |

**Figure S4.** Uni- and multivariate analyses of IBC/nIBC distinction. Forest plots showing the Odds Ratio (log10) of MARCKS expression level in IBC vs. nIBC group in a multivariate logistic regression analysis along with all clinicopathological variables.

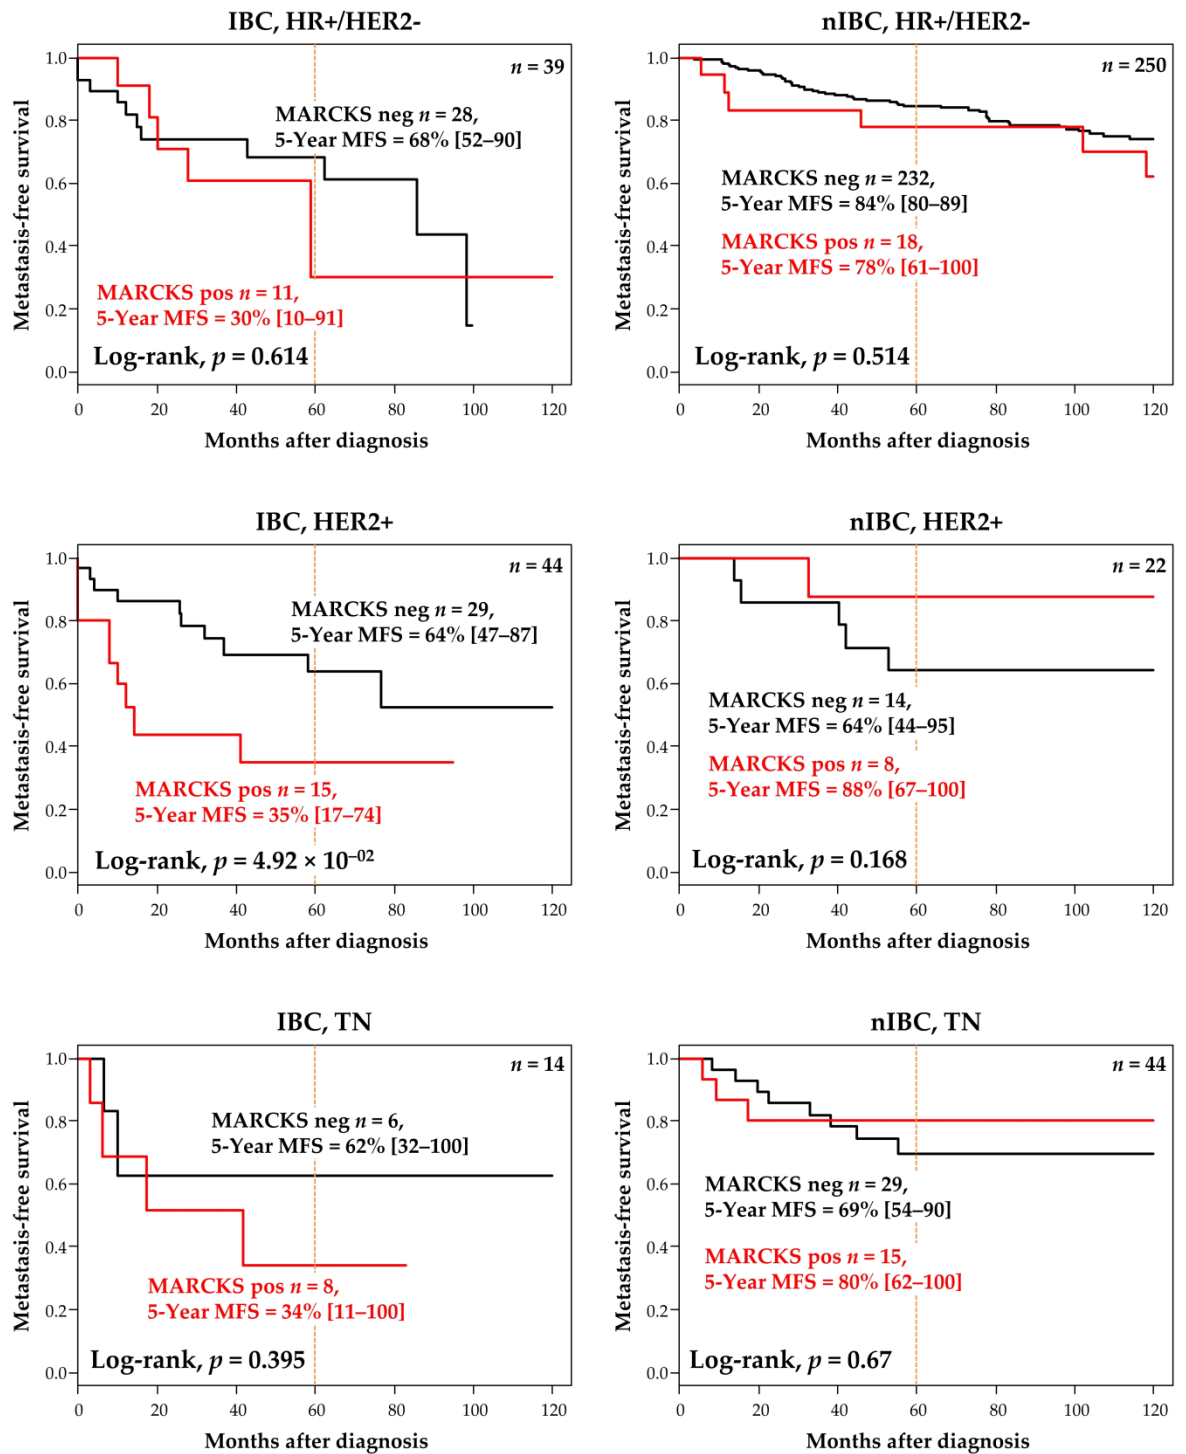

**Figure S5.** Prognostic analysis of MARCKS expression in IBC and nIBC in each molecular subtype separately. Kaplan-Meier MFS curves in IBC (left) and nIBC (right) patients according to MARCKS expression (black: negative; red: positive) in the HR+/HER2- subtype (top), in the HER2+ subtype (middle), and in the TN subtype (bottom).



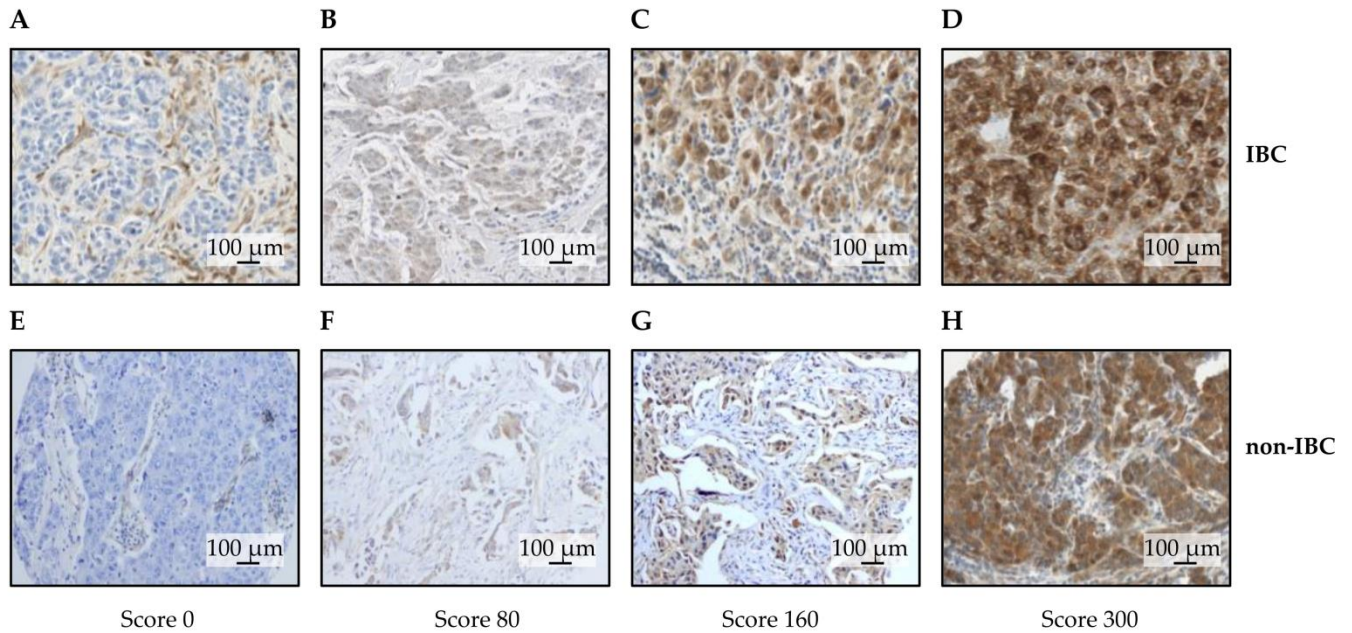

**Figure S6.** PTEN immunostaining in clinical breast cancer samples. (A–D) Representative images of immunohistochemistry staining in IBC samples show the different scores of expression: score 0 (A), score 80 (B), score 160 (C), and score 300 (D) (quick-score = percentage × intensity) (magnification ×20). (E–H) Representative images of IHC staining in nIBC samples: (E) shows a score of 0, (F) score 80, (G) score 160, and (H) score 300.

**Table S1.** Multivariate analysis of correlation between MARCKS expression (positive vs. negative) and expression of genes and signatures/scores related to EMT and stemness in IBC clinical samples.

| Multivariate MARCKS ~         |                                        | IBC                |                        |  |
|-------------------------------|----------------------------------------|--------------------|------------------------|--|
| Variable + Molecular Subtypes | <i>n</i>                               | Odds Ratio (95%CI) | <i>p</i> -Value*       |  |
| EMT genes                     | <i>TWIST2</i> mRNA                     | 1.33 (1.12–1.58)   | 1.89×10 <sup>-03</sup> |  |
|                               | <i>ZEB1</i> mRNA                       | 1.96 (1.65–2.33)   | 1.10×10 <sup>-10</sup> |  |
|                               | <i>ZEB2</i> mRNA                       | 1.86 (1.49–2.31)   | 4.74×10 <sup>-07</sup> |  |
|                               | <i>TWIST1</i> mRNA                     | 1.48 (1.25–1.75)   | 1.68×10 <sup>-05</sup> |  |
|                               | <i>VIM</i> mRNA                        | 2.02 (1.69–2.42)   | 1.09×10 <sup>-10</sup> |  |
|                               | EMT metagene [16]                      | 2.03 (1.47–2.80)   | 4.95×10 <sup>-05</sup> |  |
| Stemness genes                | <i>ALDH1A1</i> mRNA                    | 1.55 (1.28–1.87)   | 2.73×10 <sup>-05</sup> |  |
|                               | Mammary Stem Cell score [20]           | 1.97 (1.05–3.71)   | 3.90×10 <sup>-02</sup> |  |
|                               | Progenitor Luminal score [20]          | 0.67 (0.32–1.43)   | 0.303                  |  |
|                               | Mature Luminal score [20]              | 0.72 (0.33–1.56)   | 0.408                  |  |
|                               | <i>CDH1</i> mRNA                       | 0.99 (0.81–1.22)   | 0.948                  |  |
|                               | <i>CD44</i> +/ <i>CD24</i> - vs. other | 1.06 (0.77–1.47)   | 0.704                  |  |

\*, the *p*-value is for the logit link test.

**Table S2.** Uni- and multivariate prognostic analysis of MFS in patients with IBC and patients with nIBC, according to MARCKS IHC and clinico-pathological variables.

| nIBC                                  |                       |          | Univariate MFS        |                        | Multivariate MFS |                       |                        |
|---------------------------------------|-----------------------|----------|-----------------------|------------------------|------------------|-----------------------|------------------------|
|                                       |                       | <i>n</i> | Odds Ratio<br>(95%CI) | <i>p</i> -Value        | <i>n</i>         | Odds Ratio<br>(95%CI) | <i>p</i> -Value        |
| Age, years                            |                       | 355      | 0.99 (0.98–1.01)      | 0.492                  |                  |                       |                        |
| Pathological type                     | lobular vs. ductal    | 355      | 1.43 (0.84–2.44)      | 2.15×10 <sup>-02</sup> | 351              | 1.68 (0.97–2.93)      | 0.064                  |
|                                       | mixed vs. ductal      |          | 1.59 (0.73–3.46)      |                        | 351              | 1.52 (0.69–3.34)      | 0.298                  |
|                                       | other vs. ductal      |          | 0.24 (0.07–0.75)      |                        | 351              | 0.35 (0.11–1.12)      | 0.078                  |
| Pathological axillary node status, pN | 1 vs. 0               | 352      | 3.08 (1.95–4.87)      | 1.46×10 <sup>-06</sup> | 351              | 2.25 (1.40–3.63)      | 8.25×10 <sup>-04</sup> |
| Pathological tumor size (pT)          | pT2 vs. pT1           | 355      | 2.71 (1.62–4.53)      | 1.50×10 <sup>-05</sup> | 351              | 1.78 (1.03–3.07)      | 3.72×10 <sup>-02</sup> |
|                                       | pT3 vs. pT1           |          | 3.83 (2.14–6.85)      |                        | 351              | 2.51 (1.38–4.56)      | 2.59×10 <sup>-03</sup> |
|                                       | 2 vs. 1               | 354      | 2.15 (1.24–3.73)      | 3.42×10 <sup>-04</sup> | 351              | 1.62 (0.91–2.88)      | 0.100                  |
| Pathological grade                    | 3 vs. 1               |          | 3.23 (1.82–5.75)      |                        | 351              | 2.38 (1.27–4.44)      | 6.71×10 <sup>-03</sup> |
|                                       | HR+/HER2–vs.<br>HER2+ | 316      | 0.75 (0.34–1.64)      | 0.758                  |                  |                       |                        |
|                                       | TN vs. HER2+          |          | 0.83 (0.32–2.13)      |                        |                  |                       |                        |
| MARCKS 1%                             | Pos vs. neg           | 355      | 0.85 (0.45–1.60)      | 0.614                  |                  |                       |                        |
| IBC                                   |                       |          | Univariate MFS        |                        | Multivariate MFS |                       |                        |
|                                       |                       | <i>n</i> | Odds Ratio<br>(95%CI) | <i>p</i> -value        | <i>n</i>         | Odds Ratio<br>(95%CI) | <i>p</i> -value        |
| Age, years                            |                       | 115      | 1.02 (0.99–1.04)      | 0.173                  |                  |                       |                        |
| Pathological type                     | lobular vs. ductal    | 139      | 1.48 (0.67–3.25)      | 0.602                  |                  |                       |                        |
|                                       | mixed vs. ductal      |          | 0.00 (0.00 - Inf)     |                        |                  |                       |                        |
|                                       | other vs. ductal      |          | 0.40 (0.06–2.88)      |                        |                  |                       |                        |
| TNM, N                                | 1 vs. 0               | 136      | 1.86 (1.03–3.36)      | 4.11×10 <sup>-02</sup> | 136              | 1.89 (1.04–3.42)      | 3.70×10 <sup>-02</sup> |
| Pathological grade                    | 2 vs. 1               | 135      | 0.63 (0.26–1.52)      | 0.538                  |                  |                       |                        |
|                                       | 3 vs. 1               |          | 0.80 (0.36–1.79)      |                        |                  |                       |                        |
|                                       | HR+/HER2–vs.<br>HER2+ | 97       | 1.04 (0.55–1.95)      | 0.992                  |                  |                       |                        |
| Molecular Subtype                     | TN vs. HER2+          |          | 1.04 (0.41–2.58)      |                        |                  |                       |                        |
|                                       | Pos vs. neg           | 139      | 1.88 (1.14–3.11)      | 1.37×10 <sup>-02</sup> | 136              | 1.89 (1.14–3.13)      | 3.13×10 <sup>-02</sup> |

\*, the *p*-value is for the Wald test.

**Table S3.** Uni- and multivariate prognostic analysis of MFS in patients with IBC and patients with nIBC, according to PTEN IHC and clinico-pathological variables.

| nIBC                                  |                    |          | Univariate MFS        |                        | Multivariate MFS |                       |                        |
|---------------------------------------|--------------------|----------|-----------------------|------------------------|------------------|-----------------------|------------------------|
|                                       |                    | <i>n</i> | Odds Ratio<br>(95%CI) | <i>p</i> -Value        | <i>n</i>         | Odds Ratio<br>(95%CI) | <i>p</i> -Value        |
| Age, years                            |                    | 355      | 0.99 (0.98–1.01)      | 0.492                  |                  |                       |                        |
| Pathological type                     | lobular vs. ductal | 355      | 1.43 (0.84–2.44)      | 2.15×10 <sup>-02</sup> | 351              | 1.68 (0.97–2.93)      | 0.064                  |
|                                       | mixed vs. ductal   |          | 1.59 (0.73–3.46)      |                        | 351              | 1.52 (0.69–3.34)      | 0.298                  |
|                                       | other vs. ductal   |          | 0.24 (0.07–0.75)      |                        | 351              | 0.35 (0.11–1.12)      | 0.078                  |
| Pathological axillary node status, pN | 1 vs. 0            | 352      | 3.08 (1.95–4.87)      | 1.46×10 <sup>-06</sup> | 351              | 2.25 (1.40–3.63)      | 8.25×10 <sup>-04</sup> |
| Pathological tumor size (pT)          | pT2 vs. pT1        | 355      | 2.71 (1.62–4.53)      | 1.50×10 <sup>-05</sup> | 351              | 1.78 (1.03–3.07)      | 3.72×10 <sup>-02</sup> |
|                                       | pT3 vs. pT1        |          | 3.83 (2.14–6.85)      |                        | 351              | 2.51 (1.38–4.56)      | 2.59×10 <sup>-03</sup> |
|                                       | 2 vs. 1            | 354      | 2.15 (1.24–3.73)      | 3.42×10 <sup>-04</sup> | 351              | 1.62 (0.91–2.88)      | 0.100                  |
| Pathological grade                    | 3 vs. 1            |          | 3.23 (1.82–5.75)      |                        | 351              | 2.38 (1.27–4.44)      | 6.71×10 <sup>-03</sup> |
|                                       |                    |          |                       |                        |                  |                       |                        |
| Molecular Subtype                     | HR+/HER2–vs. HER2+ | 316      | 0.75 (0.34–1.64)      | 0.758                  |                  |                       |                        |
|                                       | TN vs. HER2+       |          | 0.83 (0.32–2.13)      |                        |                  |                       |                        |
| PTEN quick score-100                  | Pos vs. neg        | 231      | 1.13 (0.64–2.00)      | 0.665                  |                  |                       |                        |
| IBC                                   |                    |          | Univariate MFS        |                        | Multivariate MFS |                       |                        |
|                                       |                    | <i>n</i> | Odds Ratio<br>(95%CI) | <i>p</i> -Value        | <i>n</i>         | Odds Ratio<br>(95%CI) | <i>p</i> -Value        |
| Age, years                            |                    | 115      | 1.02 (0.99–1.04)      | 0.173                  |                  |                       |                        |
| Pathological type                     | lobular vs. ductal | 139      | 1.48 (0.67–3.25)      | 0.602                  |                  |                       |                        |
|                                       | mixed vs. ductal   |          | 0.00 (0.00–∞)         |                        |                  |                       |                        |
|                                       | other vs. ductal   |          | 0.40 (0.06–2.88)      |                        |                  |                       |                        |
| TNM, N                                | 1 vs. 0            | 136      | 1.86 (1.03–3.36)      | 4.11×10 <sup>-02</sup> | 40               | 1.39 (0.56–3.43)      | 0.48                   |
| Pathological grade                    | 2 vs. 1            | 135      | 0.63 (0.26–1.52)      | 0.538                  |                  |                       |                        |
|                                       | 3 vs. 1            |          | 0.80 (0.36–1.79)      |                        |                  |                       |                        |
|                                       |                    |          |                       |                        |                  |                       |                        |
| Molecular Subtype                     | HR+/HER2–vs. HER2+ | 97       | 1.04 (0.55–1.95)      | 0.992                  |                  |                       |                        |
|                                       | TN vs. HER2+       |          | 1.04 (0.41–2.58)      |                        |                  |                       |                        |
| PTEN quick score-100                  | Pos vs. neg        | 43       | 0.42 (0.18–0.94]      | 3.56×10 <sup>-02</sup> | 40               | 0.46 (0.19–1.11)      | 8.31×10 <sup>-02</sup> |

\*, the *p*-value is for the Wald test.



**Table S4.** Uni- and multivariate prognostic analysis of MFS in patients with IBC and patients with nIBC, according to MARCKS/PTEN IHC combination and clinicopathological variables.

| Cox, MFS <u>nIBC</u>                       |                    |          | Univariate            |                        | Multivariate |                       |                        |
|--------------------------------------------|--------------------|----------|-----------------------|------------------------|--------------|-----------------------|------------------------|
|                                            |                    | <i>n</i> | Odds Ratio<br>(95%CI) | <i>p</i> -value        | <i>n</i>     | Odds Ratio<br>(95%CI) | <i>p</i> -Value        |
| Age, years                                 |                    | 355      | 0.99 (0.98–1.01)      | 0.492                  |              |                       |                        |
| Pathological type                          | lobular vs. ductal | 355      | 1.43 (0.84–2.44)      | 2.15×10 <sup>-02</sup> | 351          | 1.68 (0.97–2.93)      | 0.064                  |
|                                            | mixed vs. ductal   |          | 1.59 (0.73–3.46)      |                        | 351          | 1.52 (0.69–3.34)      | 0.298                  |
|                                            | other vs. ductal   |          | 0.24 (0.07–0.75)      |                        | 351          | 0.35 (0.11–1.12)      | 0.078                  |
| Pathological axillary node status, pN      | 1 vs. 0            | 352      | 3.08 (1.95–4.87)      | 1.46×10 <sup>-06</sup> | 351          | 2.25 (1.40–3.63)      | 8.25×10 <sup>-04</sup> |
| Pathological tumor size (pT)               | pT2 vs. pT1        | 355      | 2.71 (1.62–4.53)      | 1.50×10 <sup>-05</sup> | 351          | 1.78 (1.03–3.07)      | 3.72×10 <sup>-02</sup> |
|                                            | pT3 vs. pT1        |          | 3.83 (2.14–6.85)      |                        | 351          | 2.51 (1.38–4.56)      | 2.59×10 <sup>-03</sup> |
| Pathological grade                         | 2 vs. 1            | 354      | 2.15 (1.24–3.73)      | 3.42×10 <sup>-04</sup> | 351          | 1.62 (0.91–2.88)      | 0.100                  |
|                                            | 3 vs. 1            |          | 3.23 (1.82–5.75)      |                        | 351          | 2.38 (1.27–4.44)      | 6.71×10 <sup>-03</sup> |
| Molecular Subtype                          | HR+/HER2–vs. HER2+ | 316      | 0.75 (0.34–1.64)      | 0.758                  |              |                       |                        |
|                                            | TN vs. HER2+       |          | 0.83 (0.32–2.13)      |                        |              |                       |                        |
| MARCKSneg/PTENpos vs. no-MARCKSneg/PTENpos |                    |          | 0.95 (0.52–1.76)      | 0.882                  |              |                       |                        |
| Cox, MFS <u>IBC</u>                        |                    |          | Univariate            |                        | Multivariate |                       |                        |
|                                            |                    | <i>n</i> | Odds Ratio<br>(95%CI) | <i>p</i> -Value        | <i>n</i>     | Odds Ratio<br>(95%CI) | <i>p</i> -Value        |
| Age, years                                 |                    | 115      | 1.02 (0.99–1.04)      | 0.173                  |              |                       |                        |
| Pathological type                          | lobular vs. ductal | 139      | 1.48 (0.67–3.25)      | 0.602                  |              |                       |                        |
|                                            | mixed vs. ductal   |          | 0.00 (0.00–Inf)       |                        |              |                       |                        |
|                                            | other vs. ductal   |          | 0.40 (0.06–2.88)      |                        |              |                       |                        |
| TNM, N                                     | 1 vs. 0            | 136      | 1.86 (1.03–3.36)      | 4.11×10 <sup>-02</sup> | 40           | 1.48 (0.60–3.66)      | 0.401                  |
| Pathological grade                         | 2 vs. 1            | 135      | 0.63 (0.26–1.52)      | 0.538                  |              |                       |                        |
|                                            | 3 vs. 1            |          | 0.80 (0.36–1.79)      |                        |              |                       |                        |
| Molecular Subtype                          | HR+/HER2–vs. HER2+ | 97       | 1.04 (0.55–1.95)      | 0.992                  |              |                       |                        |
|                                            | TN vs. HER2+       |          | 1.04 (0.41–2.58)      |                        |              |                       |                        |
| MARCKSneg/PTENpos vs. no-MARCKSneg/PTENpos |                    |          | 2.83 (1.26–6.32)      | 1.14×10 <sup>-02</sup> | 40           | 0.38 (0.16–0.90)      | 2.81×10 <sup>-02</sup> |

\*, the *p*-value is for the Wald test.
